# Supplementary material for: Optimization of Ultrasonic Flavonoid Extraction from Saussurea involucrate, and the Ability of Flavonoids to Block Melanin Deposition in Human Melanocytes
Source: PubMed Central journal article supplement (PMC7024147; doi:10.3390/molecules25020313), 2020-01-13
Supplement: molecules-25-00313-s001.pdf [file molecules-25-00313-s001.pdf]

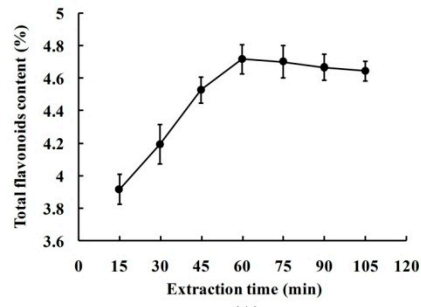

(A)

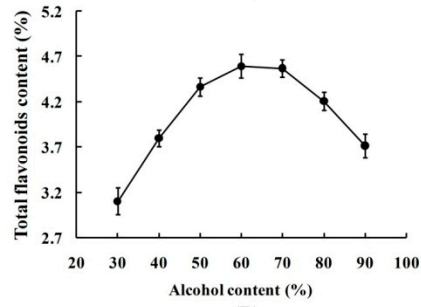

(B)

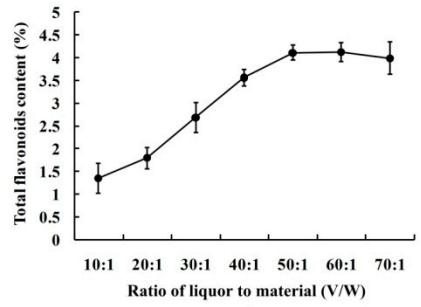

(C)

**Supplementary figure 1.** The single factor experiments. A: extraction time (min), B: ethanol content (%), and C: ratio of liquor to material (V/W)
